# Supplementary material for: Bile diversion to the distal small intestine has comparable metabolic benefits to bariatric surgery
Source: PubMed Central journal article supplement (PMC4518285; doi:10.1038/ncomms8715), 2015-07-21
Supplement: ncomms8715-s1.pdf [file ncomms8715-s1.pdf]

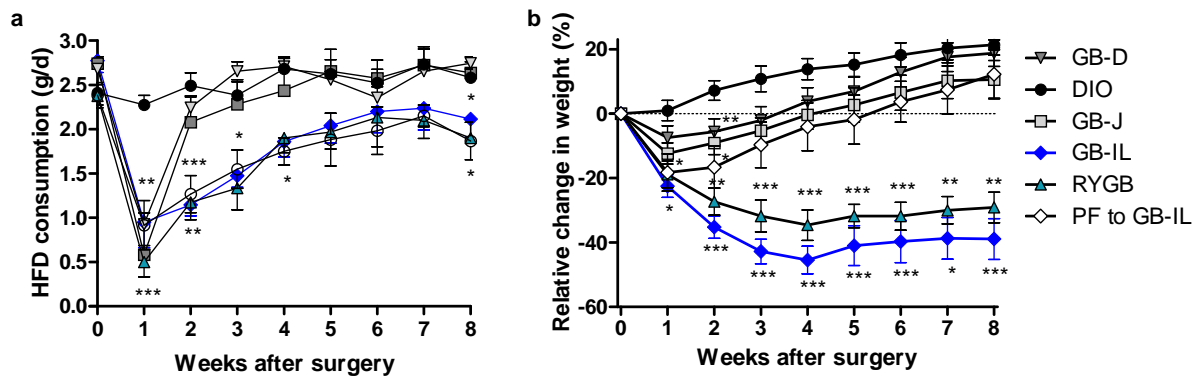

**Supplemental Figure 1.** (a) HFD consumption and (b) relative changes in body weight of DIO, GB-D, GB-J, GB-IL, RYGB and pair-fed to GB-IL mice up to eight weeks post-op. \*  $P < 0.05$ , \*\*  $P < 0.01$ , \*\*\*  $P < 0.001$  versus DIO controls. Values shown are means  $\pm$  SEM (one-way ANOVA with Dunn's post-test). N=15 DIO, 14 GB-D, 14 GB-J, 15 GB-IL, 7 RYGB, 6 PF to GB-IL.

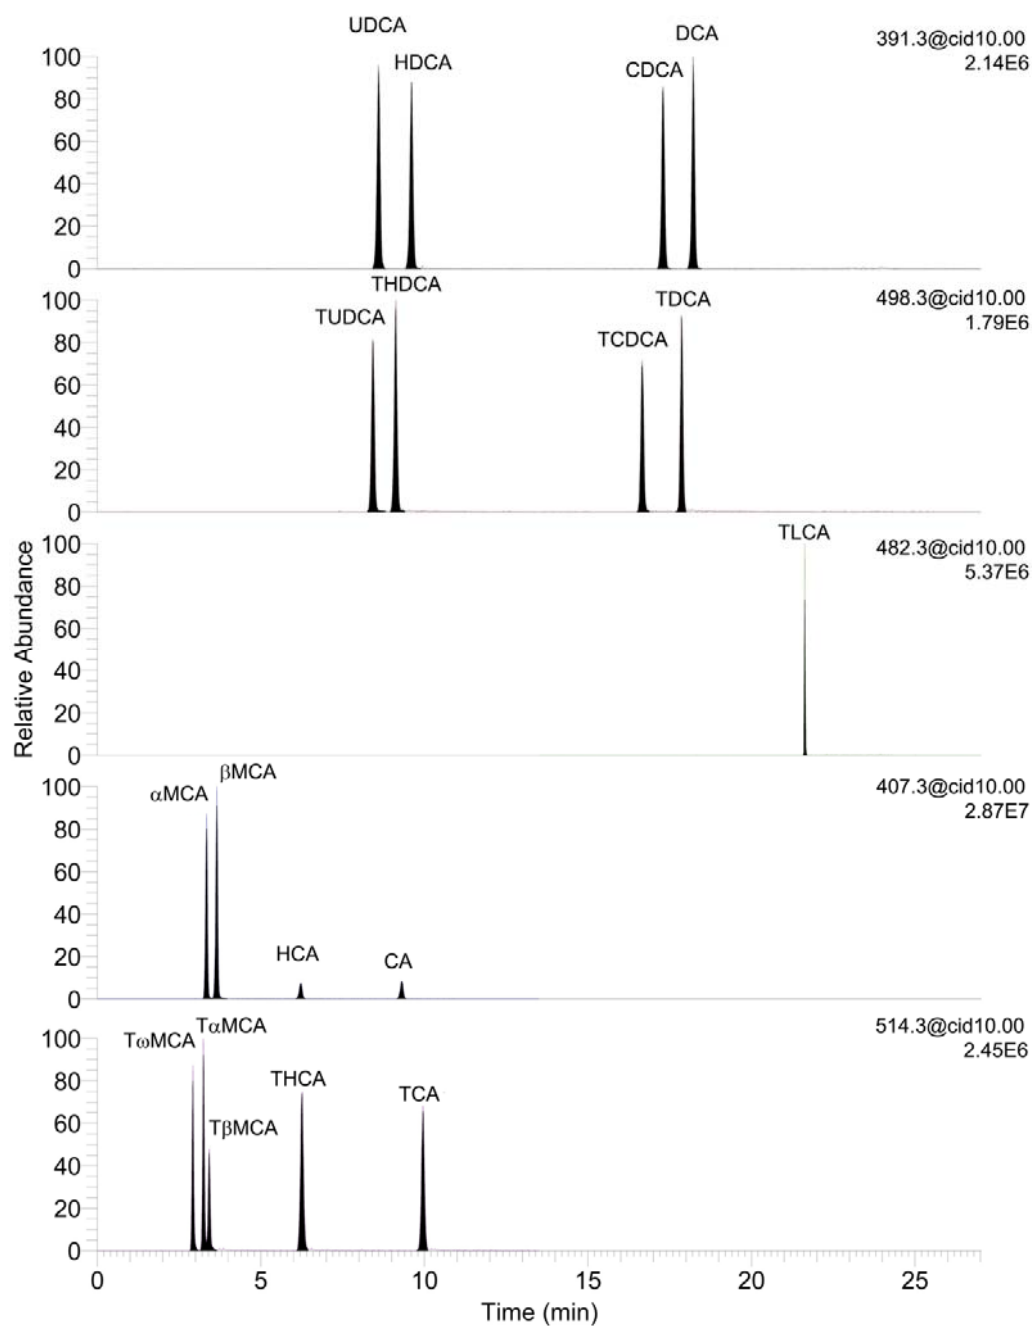

**Supplemental Figure 2.** Extracted ion chromatograms of serum bile acids resolved by high-performance liquid chromatographic ESI-MS/MS. Individual samples spikes with deuterated bile acid standards were resolved over a 28 min gradient. Eluting bile acid species were subjected to mass analysis and area under the curve (AUC) determinations were made.

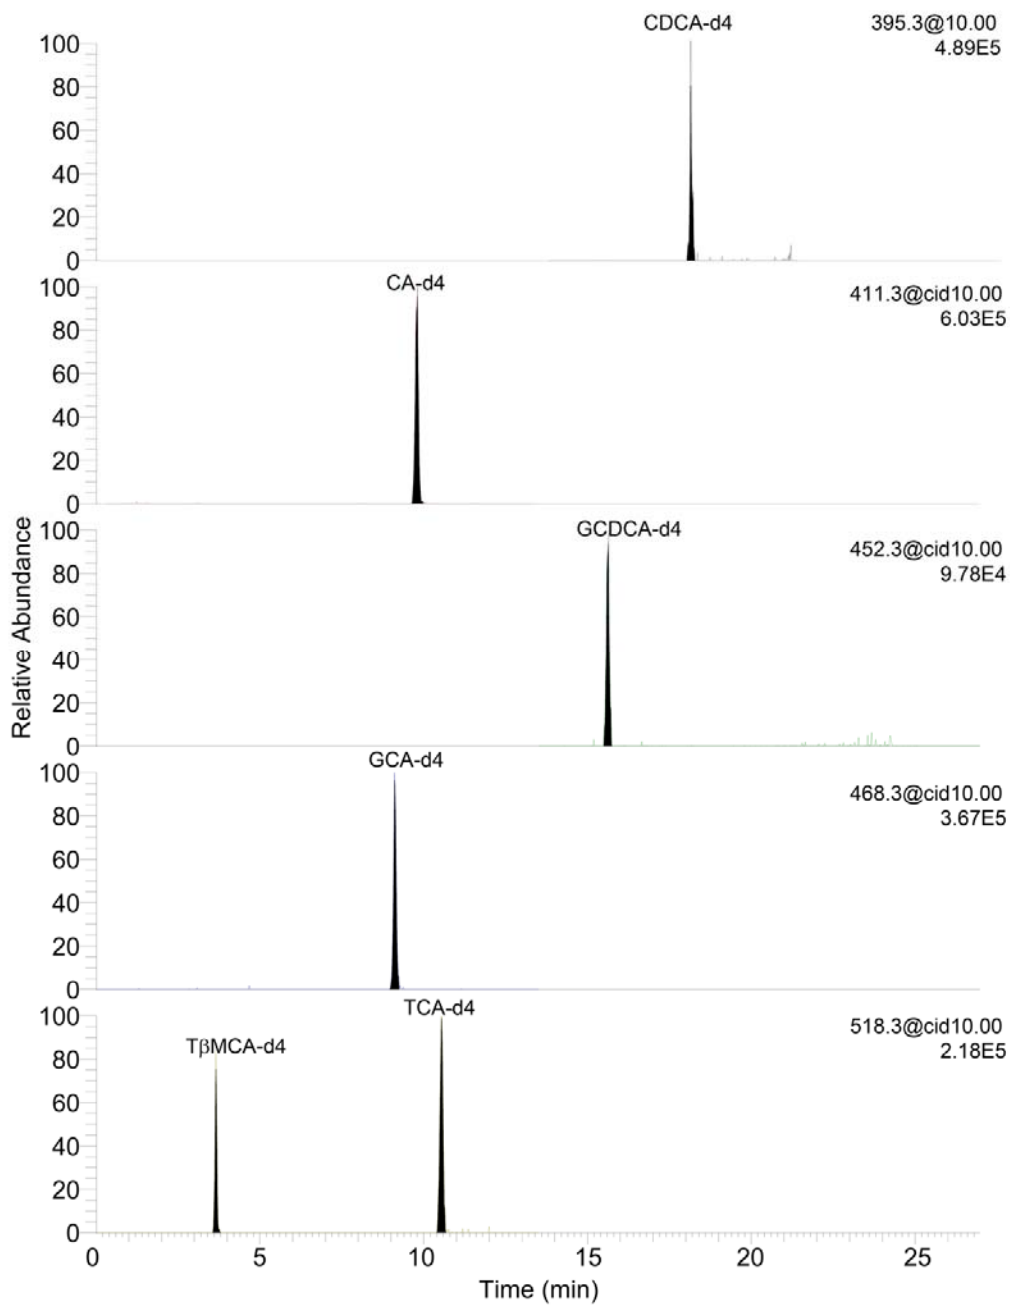

**Supplemental Figure 3.** Extracted ion chromatograms of deuterated bile acids standards used as internal standards in the quantitation analysis. Individual samples spiked with deuterated bile acid standards were resolved over a 28 min gradient and used to quantify bile acid species as described in Materials and Methods.

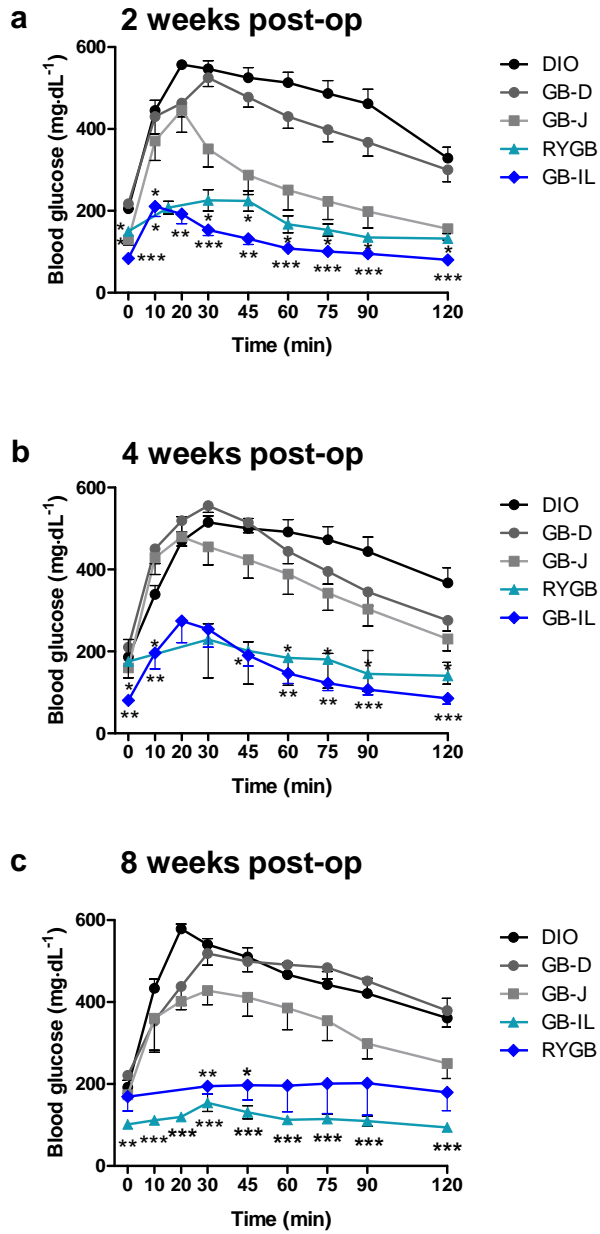

**Supplemental Figure 4.** Glucose excursion curves in DIO WT, bile diversion and RYGB mice after Intraperitoneal glucose tolerance tests (IPGTT) at A) 2 weeks post-op, B) 4 weeks post-op, and c) 8 weeks post-op. Data are shown as mean  $\pm$  SEM. \* $P < 0.05$ , \*\* $P < 0.01$ , \*\*\* $P < 0.001$  versus DIO by one-way ANOVA with post-test.

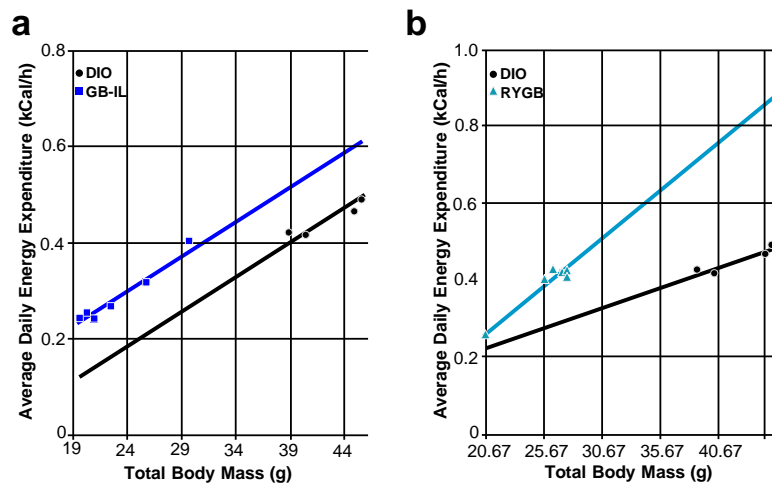

**Supplemental Figure 5.** Regression lines for ANCOVA predicted energy expenditure adjusted for total body mass (TBM) when comparing GB-IL (N=6) versus DIO (N=4) (**a**) and RYGB (N=6) versus DIO (N=4) (**b**). Energy expenditure using indirect calorimetry was measured 4 weeks after surgical procedures on diet-induced obese (DIO) mice and analyzed by analysis of covariance using surgical procedure as main effects and testing for interactions as described in the Materials and Methods and on the Mouse Metabolic Phenotyping Center website (<http://www.mmpc.org>). GB-IL mice compared to DIO mice displayed parallel linear regression lines suggestive of an increased energy expenditure that was independent of a TBM interaction (**a**). In contrast, ANCOVA-adjusted comparisons of RYGB to DIO controlling for TBM indicated an increased energy expenditure in RYGB mice that was dependent on a TBM interaction (**b**).

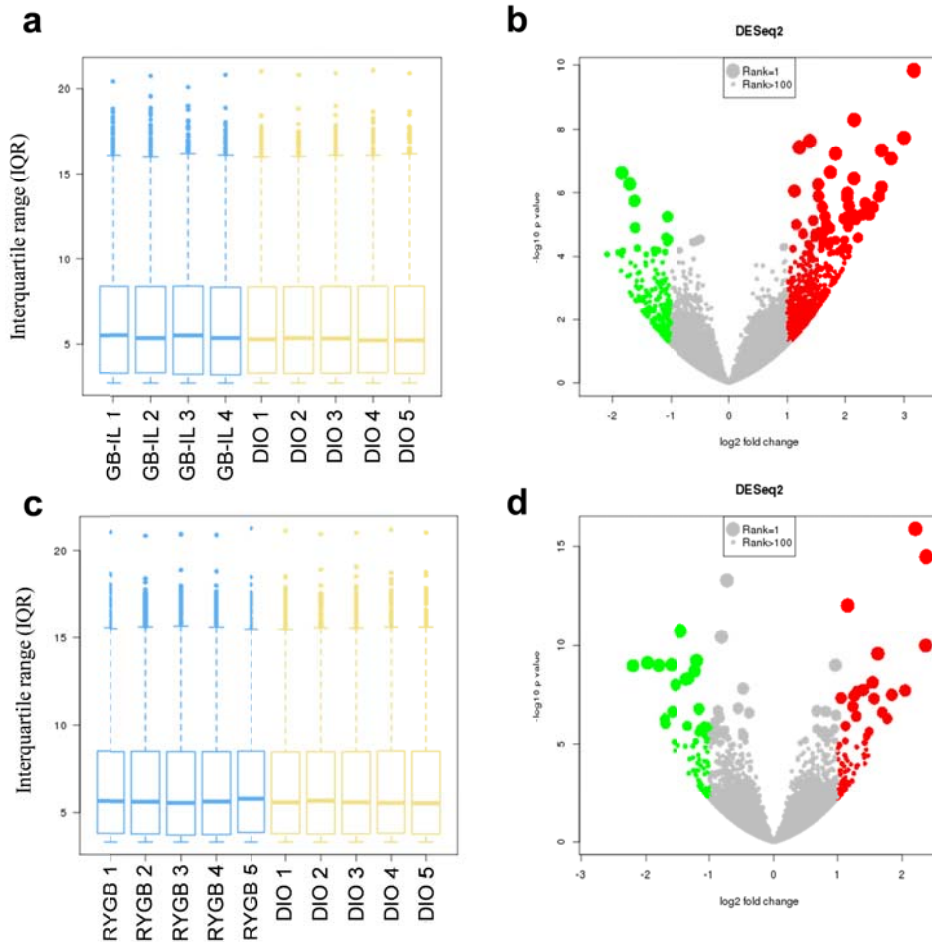

**Supplementary Figure 6.** RNA-seq analysis (all transcripts represented, filtered to remove zero values; 25,212 transcripts) from GB-IL and DIO mouse livers (**a,b**) or RYGB and DIO mouse livers (**c,d**). (**a, c**) Box plot depicting the difference among RNA-seq datasets after normalization by Robust Microarray Averaging (RMA). Boxes show the 25th and 75th percentiles in the distribution of log-transformed (log base 2) intensities. The median is the horizontal bar in the middle of the box. The whiskers (dotted lines extending from the boxes) illustrate the maximum value or 1.5 times the interquartile range of data (IQR), whichever is smaller. The circles display any points beyond these whiskers. (**b,d**) Volcano plots of  $\log_2$  fold-change (x-axis) versus  $-\log_{10}$  FDR-corrected p-value (y-axis, representing the probability that the gene is differentially expressed) in RNA-seq data of mouse livers from GB-IL vs DIO (**b**) and RYGB vs DIO mice (**d**).

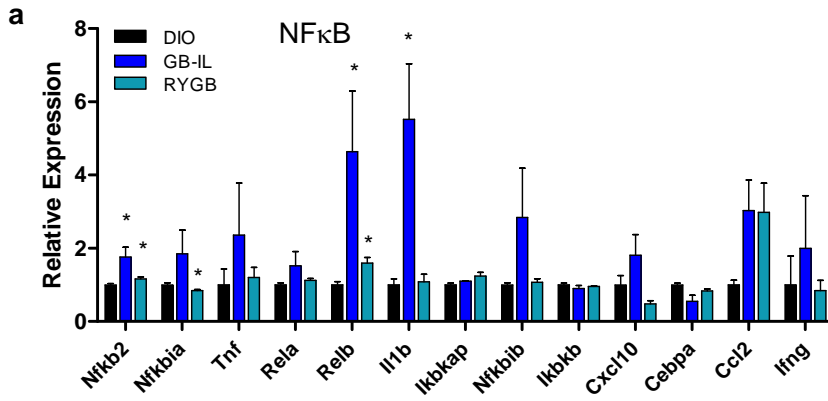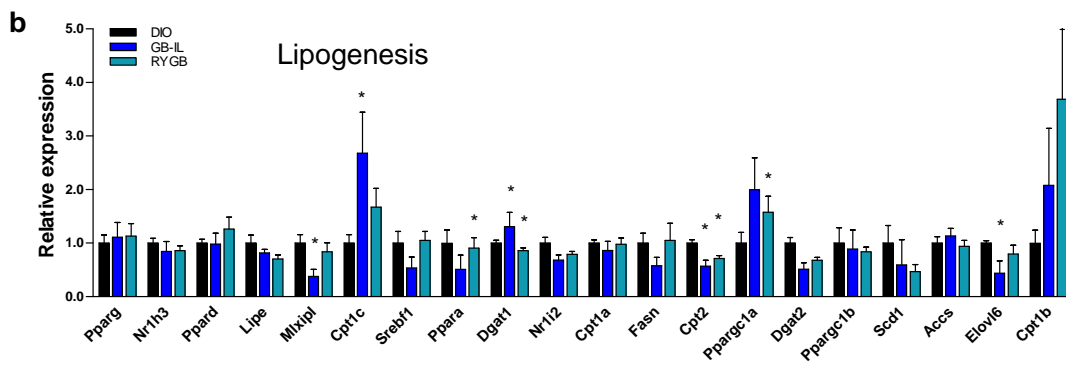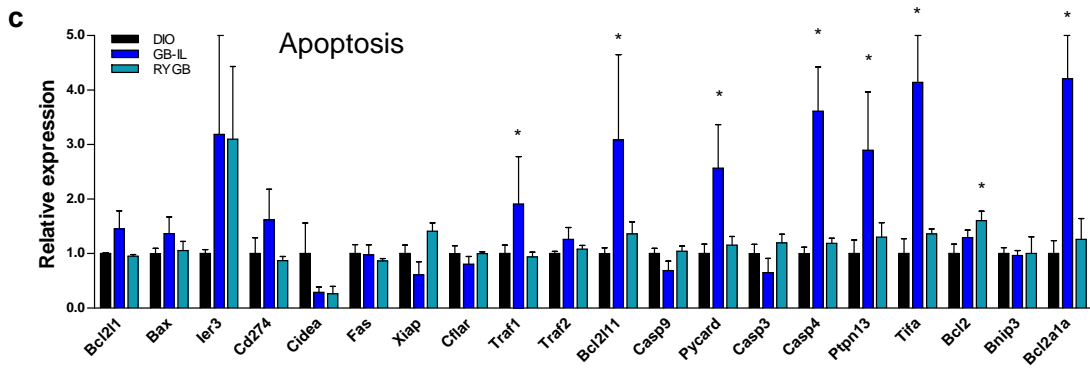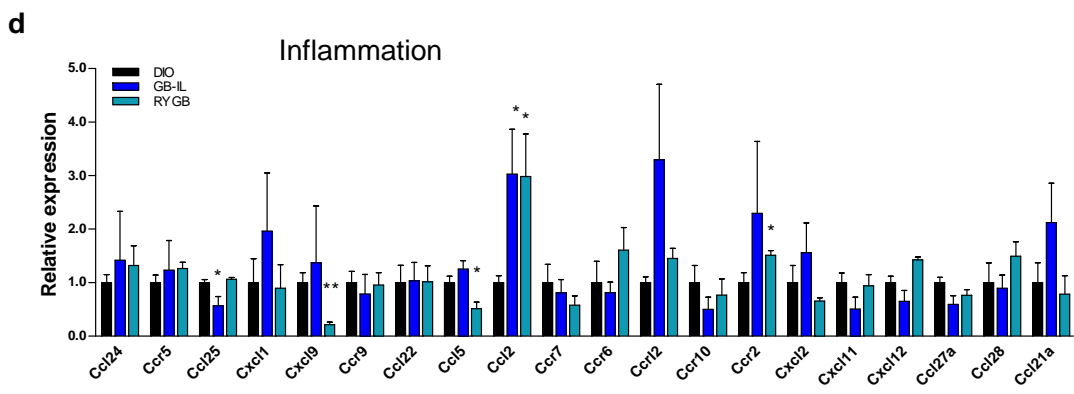

**Supplementary Figure 7.** Bile diversion to the ileum (GB-IL) and RYGB have differential effects on hepatic gene expression. RNA-seq analysis of **(a)** NF $\kappa$ B-related genes, **(b)** lipogenesis genes, **(c)** apoptosis genes and **(d)** inflammatory genes in the livers of DIO, GB-IL and RYGB mice as assigned to canonical pathways curated by Ingenuity Pathway Analysis. Expression was normalized as described in Supplementary Materials and Methods. N= 4-5 mice per group. Data are presented as mean  $\pm$  SEM, unpaired two-tailed Student's *t*-test. \* $P$ <0.05, \* $P$ <0.01 compared with DIO controls.



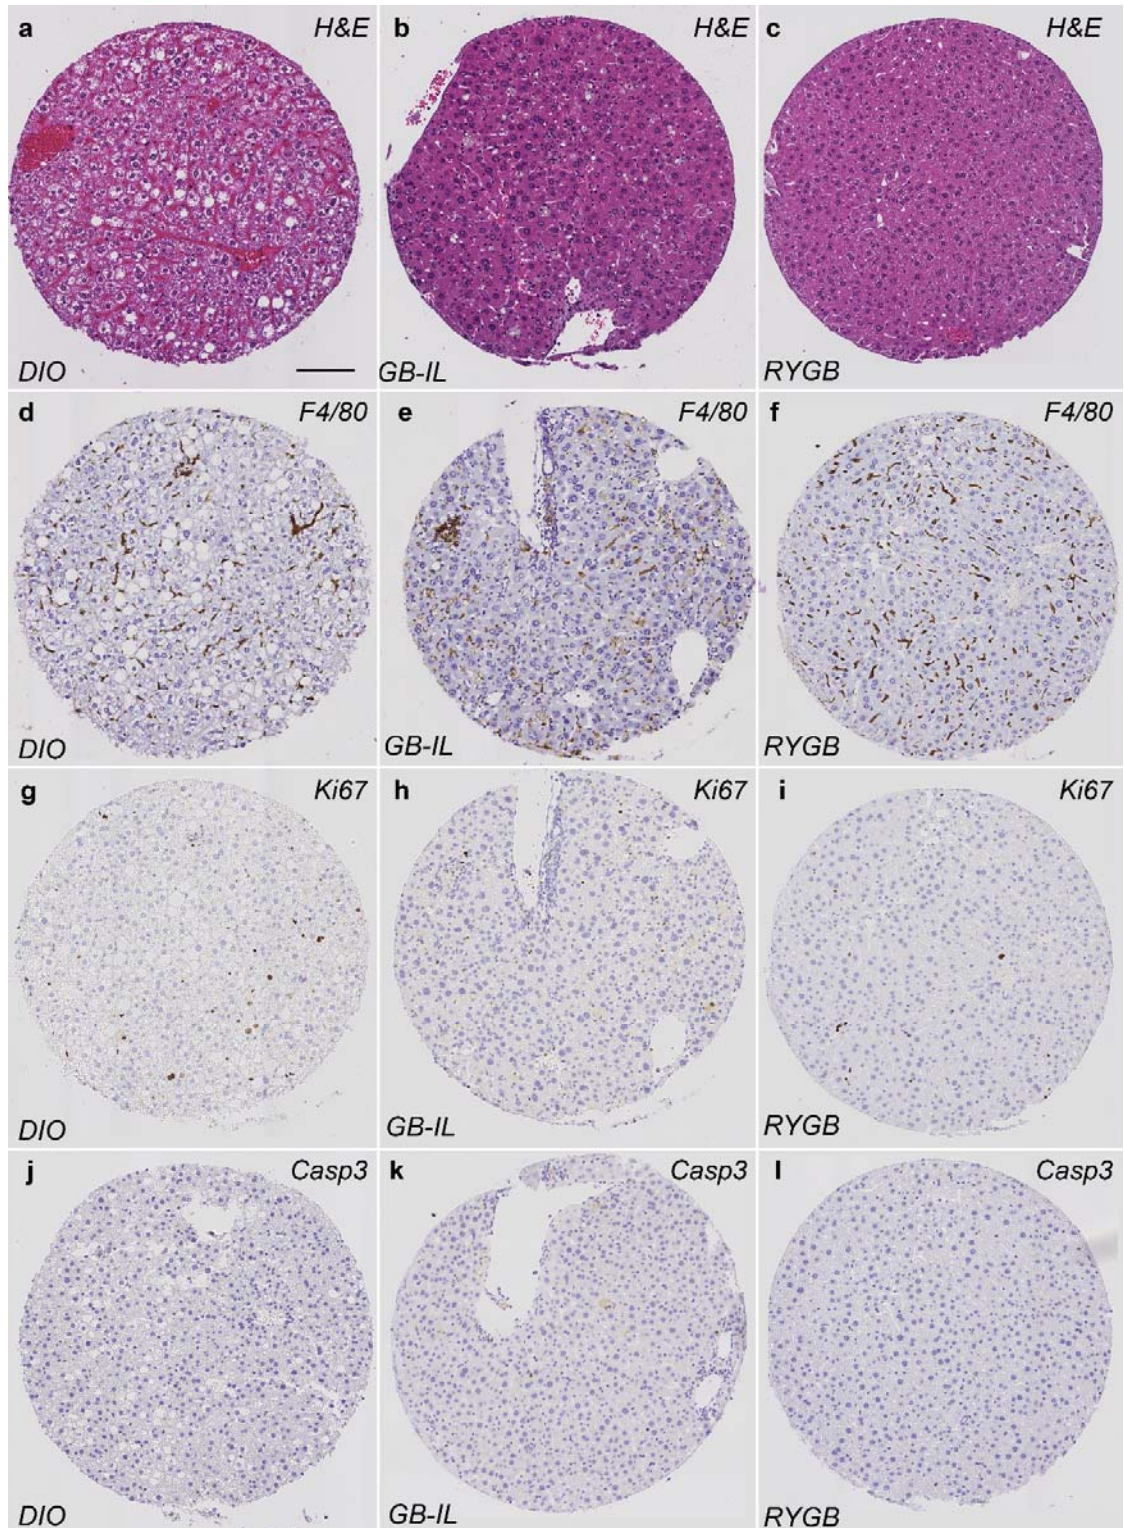

**Supplemental Figure 8.** Representative micrographs of DIO, GB-IL and RYGB mouse livers at 4 weeks post-operative stained for hematoxylin and eosin (a-c) and F4/80 (d-f), Ki-67 (g-i) and caspase 3 (j-l) revealed by DAB reactivity and counter-stained for eosin. Mag bar = 100  $\mu$ m.

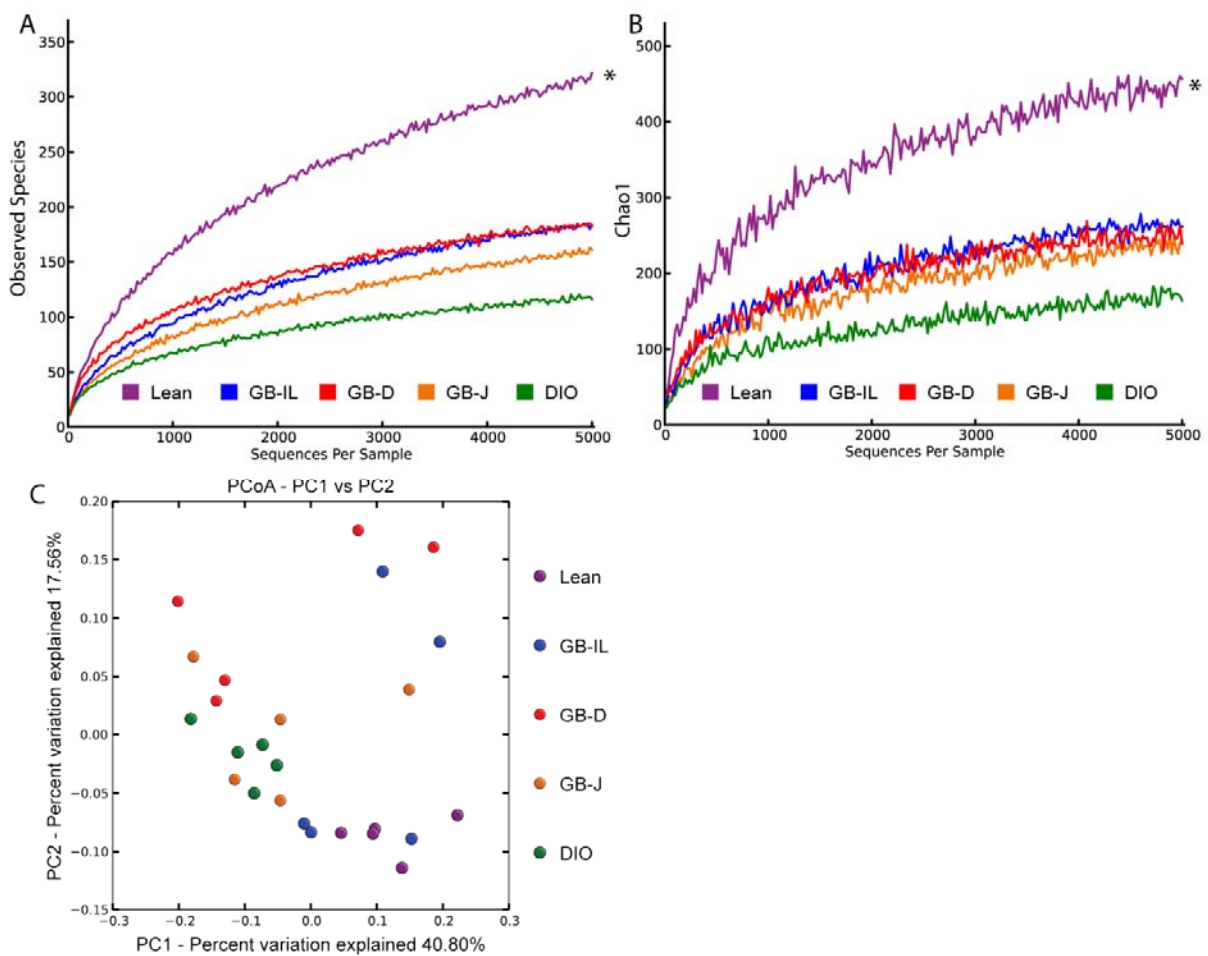

**Supplemental Figure 9.** High fat diet decreases gut microbial diversity. Cecal contents were obtained 8 weeks after surgery. Microbial diversity was analyzed by bacterial tag encoded FLX amplicon pyrosequencing (bTEFAP) using a Roche 454 pyrosequencer and titanium reagents, and 3-5k nominal sequences per sample of high quality extracted DNA **(a)** Rarefaction curves (OUT at sequences dissimilarity cutoff < 3%). Rarefaction curves were calculated for OTUs and indicated that the analysis neared plateau but could benefit from additional sequencing. **(b)** Chao1 estimates of gut microbial diversity. \* $P < 0.05$  **(c)** Principal component analysis indicating each sample microbiota variance relative to each other.  $N = 5$  per group.

**Supplemental Table 1.** Analytical settings for detected bile acids.

| <u>Species</u>                   | <u>m/z</u> | <u>R.T.</u> | <u>Internal Standard</u> |
|----------------------------------|------------|-------------|--------------------------|
| T $\omega$ MCA                   | 514.3      | 2.72        | T $\beta$ MCA-d4         |
| $\omega$ MCA                     | 407.3      | 2.80        | CA-d4                    |
| T $\alpha$ MCA                   | 514.3      | 3.01        | T $\beta$ MCA-d4         |
| $\alpha$ MCA                     | 407.3      | 3.17        | CA-d4                    |
| T $\beta$ MCA                    | 514.3      | 3.17        | T $\beta$ MCA-d4         |
| $\beta$ MCA                      | 407.3      | 3.49        | CA-d4                    |
| THCA                             | 514.3      | 5.80        | GCA-d4                   |
| HCA                              | 407.3      | 6.22        | CA-d4                    |
| TUDCA                            | 498.3      | 8.06        | GCDCA-d4                 |
| UDCA                             | 391.3      | 8.37        | CDCA-d4                  |
| THDCA                            | 498.3      | 8.70        | GCDCA-d4                 |
| CA                               | 407.3      | 9.00        | CA-d4                    |
| HDCA                             | 391.3      | 9.36        | CDCA-d4                  |
| TCA                              | 514.3      | 9.50        | TCA-d4                   |
| TCDCa                            | 498.3      | 16.19       | TCA-d4                   |
| CDCA                             | 391.3      | 17.00       | CDCA-d4                  |
| TDCA                             | 498.3      | 17.48       | TCA-d4                   |
| DCA                              | 391.3      | 17.94       | CDCA-d4                  |
| TLCA                             | 482.3      | 21.59       | CDCA-d4                  |
| <b>GCDCA-d4</b>                  | 452.3      | 14.50       |                          |
| <b>CDCA-d4</b>                   | 395.3      | 17.00       |                          |
| <b>TCA-d4</b>                    | 518.3      | 9.50        |                          |
| <b>CA-d4</b>                     | 411.3      | 9.00        |                          |
| <b>T<math>\beta</math>MCA-d4</b> | 518.3      | 3.17        |                          |
| <b>GCA-d4</b>                    | 468.3      | 8.14        |                          |

**Bold: deuterated internal standards**

---

**Supplemental Table 2.** Mean  $\pm$  SEM bile acid species levels in bile diverted and RYGB mouse serum.

| <b>BA Species</b> | <b>Obese</b>       | <b>GB-D</b>       | <b>GB-J</b>       | <b>GB-IL</b>        | <b>RYGB</b>       |
|-------------------|--------------------|-------------------|-------------------|---------------------|-------------------|
| T $\omega$ MCA    | 291.1 $\pm$ 80.2   | 291.8 $\pm$ 157   | 376.9 $\pm$ 81.2  | 1609.6 $\pm$ 437.4  | 185.9 $\pm$ 74.8  |
| T $\beta$ MCA     | 1145.3 $\pm$ 273.6 | 662 $\pm$ 234.1   | 692.3 $\pm$ 257.9 | 9741.9 $\pm$ 2040.2 | 947.3 $\pm$ 515.9 |
| T $\alpha$ MCA    | 179.7 $\pm$ 50.6   | 131.3 $\pm$ 77.6  | 128.3 $\pm$ 50.9  | 110.9 $\pm$ 34      | 89.3 $\pm$ 42.1   |
| CA                | 191.6 $\pm$ 51.2   | 544 $\pm$ 356.9   | 199.4 $\pm$ 80.5  | 76.4 $\pm$ 13.5     | 485.5 $\pm$ 427.1 |
| TCDC              | 46.1 $\pm$ 11.3    | 18.7 $\pm$ 39.2   | 25.1 $\pm$ 9.4    | 29.9 $\pm$ 13       | 17 $\pm$ 2.3      |
| DCA               | 51.6 $\pm$ 8.6     | 120.8 $\pm$ 77.2  | 24.4 $\pm$ 8.6    | 28.4 $\pm$ 14.3     | 76.5 $\pm$ 46.4   |
| TCA               | 1216.9 $\pm$ 369.6 | 665.6 $\pm$ 163.6 | 740.5 $\pm$ 166.6 | 2202.1 $\pm$ 846.6  | 476.2 $\pm$ 245.4 |
| $\beta$ MCA       | 15.2 $\pm$ 0.6     | 30.8 $\pm$ 7.9    | 0 $\pm$ 0         | 42.5 $\pm$ 5.6      | 38.5 $\pm$ 14.9   |
| TUDCA             | 42.5 $\pm$ 12.3    | 51 $\pm$ 20.2     | 41.1 $\pm$ 10.8   | 64.5 $\pm$ 11.6     | 0 $\pm$ 0         |
| TDCA              | 11.1 $\pm$ 3.2     | 167.2 $\pm$ 77.3  | 40.2 $\pm$ 14.1   | 21.3 $\pm$ 5.4      | 31.7 $\pm$ 10.3   |
| THDCA             | 10.8 $\pm$ 3.8     | 55.4 $\pm$ 11.7   | 24.7 $\pm$ 7.5    | 32.9 $\pm$ 13.4     | 62.1 $\pm$ 24.8   |
| CDCA              | 5.8 $\pm$ 0        | 64 $\pm$ 45.3     | 22.4 $\pm$ 15.8   | 0 $\pm$ 0           | 38.2 $\pm$ 27     |

*n* = 5 mice per group

**Supplemental Table 3.** Basic mean and two-way ANOVA contrasts adjusted for total body mass (TBM) and fat-free mass (FFM).

|           |       |          | Basic Stats   |              |               |              | Model Overall |              |         |              |               |         |
|-----------|-------|----------|---------------|--------------|---------------|--------------|---------------|--------------|---------|--------------|---------------|---------|
| Covariate | Phase | Variable | DIO           | GBIL         | DIO           | RYGB         | DIO           | GBIL         | p-value | DIO          | RYGB          | p value |
| TBM       | Light | Avg_EE   | 0.42 (0.031)  | 0.28 (0.037) | 0.42 (0.031)  | 0.36 (0.052) | 0.3 (0.013)   | 0.36 (0.009) | 0.016   | 0.32 (0.03)  | 0.5 (0.019)   | 0.003   |
| FFM       | Light | Avg_EE   | 0.42 (0.031)  | 0.28 (0.037) | 0.42 (0.031)  | 0.36 (0.052) | 0.36 (0.012)  | 0.32 (0.009) | 0.050   | 0.37 (0.017) | 0.4 (0.013)   | 0.241   |
| TBM       | Light | Tot_EE   | 4.32 (0.321)  | 2.9 (0.391)  | 4.32 (0.321)  | 3.75 (0.547) | 3.07 (0.135)  | 3.73 (0.093) | 0.019   | 3.31 (0.32)  | 5.13 (0.203)  | 0.003   |
| FFM       | Light | Tot_EE   | 4.32 (0.321)  | 2.9 (0.391)  | 4.32 (0.321)  | 3.75 (0.547) | 3.74 (0.122)  | 3.28 (0.09)  | 0.040   | 3.78 (0.169) | 4.11 (0.129)  | 0.227   |
| TBM       | Light | Avg_VO2  | 1.45 (0.108)  | 0.98 (0.134) | 1.45 (0.108)  | 1.26 (0.18)  | 1.03 (0.047)  | 1.26 (0.033) | 0.018   | 0.93 (0.099) | 1.61 (0.068)  | 0.004   |
| FFM       | Light | Avg_VO2  | 1.45 (0.108)  | 0.98 (0.134) | 1.45 (0.108)  | 1.26 (0.18)  | 1.26 (0.044)  | 1.1 (0.033)  | 0.055   | 1.28 (0.058) | 1.38 (0.044)  | 0.269   |
| TBM       | Light | Avg_VCO2 | 1.13 (0.087)  | 0.79 (0.087) | 1.13 (0.087)  | 0.99 (0.145) | 0.83 (0.037)  | 0.99 (0.025) | 0.035   | 0.85 (0.079) | 1.36 (0.05)   | 0.002   |
| FFM       | Light | Avg_VCO2 | 1.13 (0.087)  | 0.79 (0.087) | 1.13 (0.087)  | 0.99 (0.145) | 0.99 (0.032)  | 0.88 (0.023) | 0.051   | 0.98 (0.045) | 1.09 (0.034)  | 0.143   |
| TBM       | Light | Avg_RQ   | 0.77 (0.007)  | 0.81 (0.028) | 0.77 (0.007)  | 0.79 (0.008) | 0.81 (0.03)   | 0.78 (0.021) | 0.639   | 0.76 (0.011) | 0.79 (0.008)  | 0.107   |
| FFM       | Light | Avg_RQ   | 0.77 (0.007)  | 0.81 (0.028) | 0.77 (0.007)  | 0.79 (0.008) | 0.79 (0.018)  | 0.8 (0.014)  | 0.747   | 0.77 (0.005) | 0.79 (0.004)  | 0.031   |
| TBM       | Dark  | Avg_EE   | 0.48 (0.032)  | 0.29 (0.078) | 0.48 (0.032)  | 0.41 (0.078) | 0.36 (0.044)  | 0.46 (0.021) | 0.081   | 0.38 (0.044) | 0.61 (0.028)  | 0.004   |
| FFM       | Dark  | Avg_EE   | 0.48 (0.032)  | 0.29 (0.078) | 0.48 (0.032)  | 0.41 (0.078) | 0.38 (0.022)  | 0.36 (0.016) | 0.599   | 0.41 (0.021) | 0.46 (0.016)  | 0.108   |
| TBM       | Dark  | Tot_EE   | 5.76 (0.383)  | 3.51 (0.941) | 5.76 (0.383)  | 4.95 (0.93)  | 4.28 (0.534)  | 5.52 (0.25)  | 0.081   | 4.5 (0.524)  | 7.28 (0.332)  | 0.004   |
| FFM       | Dark  | Tot_EE   | 5.76 (0.383)  | 3.51 (0.941) | 5.76 (0.383)  | 4.95 (0.93)  | 4.54 (0.261)  | 4.33 (0.193) | 0.599   | 4.87 (0.253) | 5.54 (0.192)  | 0.108   |
| TBM       | Dark  | Avg_VO2  | 1.66 (0.11)   | 1.01 (0.274) | 1.66 (0.11)   | 1.42 (0.263) | 0.92 (0.121)  | 1.51 (0.084) | 0.020   | 1.3 (0.154)  | 2.08 (0.098)  | 0.005   |
| FFM       | Dark  | Avg_VO2  | 1.66 (0.11)   | 1.01 (0.274) | 1.66 (0.11)   | 1.42 (0.263) | 1.31 (0.077)  | 1.25 (0.057) | 0.629   | 1.41 (0.072) | 1.59 (0.055)  | 0.131   |
| TBM       | Dark  | Avg_VCO2 | 1.32 (0.092)  | 0.8 (0.206)  | 1.32 (0.092)  | 1.16 (0.233) | 0.75 (0.087)  | 1.18 (0.06)  | 0.018   | 1.02 (0.119) | 1.75 (0.076)  | 0.002   |
| FFM       | Dark  | Avg_VCO2 | 1.32 (0.092)  | 0.8 (0.206)  | 1.32 (0.092)  | 1.16 (0.233) | 1.04 (0.055)  | 0.98 (0.04)  | 0.469   | 1.09 (0.063) | 1.3 (0.048)   | 0.056   |
| TBM       | Dark  | Avg_RQ   | 0.79 (0.01)   | 0.79 (0.024) | 0.79 (0.01)   | 0.81 (0.027) | 0.8 (0.028)   | 0.78 (0.02)  | 0.744   | 0.75 (0.028) | 0.84 (0.02)   | 0.087   |
| FFM       | Dark  | Avg_RQ   | 0.79 (0.01)   | 0.79 (0.024) | 0.79 (0.01)   | 0.81 (0.027) | 0.79 (0.017)  | 0.79 (0.013) | 0.860   | 0.77 (0.014) | 0.82 (0.011)  | 0.059   |
| TBM       | Total | Avg_EE   | 0.45 (0.031)  | 0.29 (0.057) | 0.45 (0.031)  | 0.39 (0.064) | 0.28 (0.02)   | 0.4 (0.014)  | 0.010   | 0.35 (0.033) | 0.55 (0.021)  | 0.002   |
| FFM       | Total | Avg_EE   | 0.45 (0.031)  | 0.29 (0.057) | 0.45 (0.031)  | 0.39 (0.064) | 0.37 (0.015)  | 0.34 (0.011) | 0.221   | 0.39 (0.018) | 0.43 (0.014)  | 0.137   |
| TBM       | Total | Tot_EE   | 10.08 (0.699) | 6.41 (1.325) | 10.08 (0.699) | 8.7 (1.467)  | 6.29 (0.48)   | 8.94 (0.333) | 0.011   | 7.81 (0.763) | 12.41 (0.484) | 0.002   |
| FFM       | Total | Tot_EE   | 10.08 (0.699) | 6.41 (1.325) | 10.08 (0.699) | 8.7 (1.467)  | 8.29 (0.346)  | 7.61 (0.256) | 0.234   | 8.65 (0.403) | 9.65 (0.306)  | 0.131   |
| TBM       | Total | Avg_VO2  | 1.56 (0.108)  | 0.99 (0.203) | 1.56 (0.108)  | 1.34 (0.219) | 0.98 (0.074)  | 1.38 (0.051) | 0.011   | 1.21 (0.116) | 1.9 (0.073)   | 0.002   |
| FFM       | Total | Avg_VO2  | 1.56 (0.108)  | 0.99 (0.203) | 1.56 (0.108)  | 1.34 (0.219) | 1.28 (0.055)  | 1.18 (0.041) | 0.243   | 1.34 (0.062) | 1.48 (0.047)  | 0.162   |
| TBM       | Total | Avg_VCO2 | 1.22 (0.089)  | 0.79 (0.145) | 1.22 (0.089)  | 1.08 (0.187) | 0.79 (0.047)  | 1.08 (0.033) | 0.007   | 0.94 (0.086) | 1.55 (0.054)  | 0.001   |
| FFM       | Total | Avg_VCO2 | 1.22 (0.089)  | 0.79 (0.145) | 1.22 (0.089)  | 1.08 (0.187) | 1.02 (0.036)  | 0.93 (0.027) | 0.150   | 1.04 (0.051) | 1.2 (0.039)   | 0.069   |
| TBM       | Total | Avg_RQ   | 0.78 (0.009)  | 0.8 (0.025)  | 0.78 (0.009)  | 0.8 (0.015)  | 0.8 (0.029)   | 0.78 (0.02)  | 0.685   | 0.75 (0.016) | 0.82 (0.011)  | 0.046   |
| FFM       | Total | Avg_RQ   | 0.78 (0.009)  | 0.8 (0.025)  | 0.78 (0.009)  | 0.8 (0.015)  | 0.79 (0.017)  | 0.79 (0.013) | 0.934   | 0.77 (0.008) | 0.8 (0.006)   | 0.020   |

For ANOVA of main effects, cells indicating  $*P \leq 0.05$  are shaded pink, cells indicating  $*P \leq 0.01$  are shaded red and cells indicating  $*P \leq 0.001$  are shaded dark red. (n=4 DIO, 6 GB-IL and 6 RYGB). Indirect calorimetry parameters were compared by a 3-way analysis of variances using surgical procedure (GB-IL or RYGB) as main effects and testing for interactions with covariates being either total body mass (TBM) or fat-free mass (FFM; italics). Least squares means were compared using residual variance as the error term and presented as mean  $\pm$  SEM. Abbreviations: Avg\_EE, mean energy expenditure in kcal/hr; Tot\_EE, Summed energy expenditure for entire cycle; Avg\_VO2, mean volume of O<sub>2</sub> ml/min; Avg\_VCO2, mean volume of CO<sub>2</sub> ml/min; Avg\_RQ, mean respiratory quotient).



**Supplemental Table 4.** Weighted Unifrac significance test

| Group |       | <i>P</i> value |
|-------|-------|----------------|
| DIO   | Lean  | <b>0.03</b>    |
| GB-D  | GB-IL | <b>0.05</b>    |
|       | GB-J  | 0.62           |
|       | HFD   | 0.39           |
|       | Lean  | <b>0.04</b>    |
| GB-J  | DIO   | 0.87           |
|       | Lean  | <b>0.00</b>    |
| GB-IL | GB-J  | <b>0.03</b>    |
|       | DIO   | 0.06           |
|       | Lean  | 0.06           |

Supplemental Table 5. OTU table.

| Taxon                                                                                                              | Lean  | GB-IL | GB-D  | GB-J  | DIO   |
|--------------------------------------------------------------------------------------------------------------------|-------|-------|-------|-------|-------|
| None;Other;Other;Other;Other;Other                                                                                 | 7159  | 7186  | 4041  | 5991  | 6392  |
| k__Bacteria;Other;Other;Other;Other;Other                                                                          | 2     | 0     | 0     | 1     | 0     |
| k__Bacteria;p__Actinobacteria;c__Actinobacteria;o__Bifidobacteriales;f__Bifidobacteriaceae;g__Bifidobacterium      | 25    | 103   | 8     | 54    | 38    |
| k__Bacteria;p__Actinobacteria;c__Thermoleophilia;o__Gaiellales;f__Gaiellaceae;g__                                  | 2     | 0     | 2     | 0     | 0     |
| k__Bacteria;p__Bacteroidetes;c__Bacteroidia;o__Bacteroidales;Other;Other                                           | 4     | 0     | 0     | 0     | 0     |
| k__Bacteria;p__Bacteroidetes;c__Bacteroidia;o__Bacteroidales;f__g__                                                | 36    | 0     | 0     | 11    | 0     |
| k__Bacteria;p__Bacteroidetes;c__Bacteroidia;o__Bacteroidales;f__Bacteroidaceae;g__Bacteroides                      | 2329  | 1338  | 7     | 18    | 5     |
| k__Bacteria;p__Bacteroidetes;c__Bacteroidia;o__Bacteroidales;f__Porphyromonadaceae;g__Parabacteroides              | 250   | 404   | 0     | 26    | 0     |
| k__Bacteria;p__Bacteroidetes;c__Bacteroidia;o__Bacteroidales;f__Prevotellaceae;g__Prevotella                       | 276   | 0     | 0     | 1     | 0     |
| k__Bacteria;p__Bacteroidetes;c__Bacteroidia;o__Bacteroidales;f__Rikenellaceae;g__                                  | 2607  | 80    | 258   | 125   | 27    |
| k__Bacteria;p__Bacteroidetes;c__Bacteroidia;o__Bacteroidales;f__Rikenellaceae;g__AF12                              | 38    | 1     | 0     | 27    | 2     |
| k__Bacteria;p__Bacteroidetes;c__Bacteroidia;o__Bacteroidales;f__S24-7;g__                                          | 10038 | 117   | 85    | 87    | 5     |
| k__Bacteria;p__Bacteroidetes;c__Bacteroidia;o__Bacteroidales;f__[Odoribacteraceae];g__Odoribacter                  | 64    | 1     | 6     | 44    | 0     |
| k__Bacteria;p__Deferribacteres;c__Deferribacteres;o__Deferribacterales;f__Deferribacteraceae;g__Mucispirillum      | 14    | 3     | 1     | 24    | 0     |
| k__Bacteria;p__Firmicutes;c__Bacilli;o__Bacillales;f__Staphylococcaceae;g__Staphylococcus                          | 0     | 7     | 0     | 0     | 0     |
| k__Bacteria;p__Firmicutes;c__Bacilli;o__Lactobacillales;f__Enterococcaceae;g__Enterococcus                         | 185   | 2431  | 301   | 293   | 364   |
| k__Bacteria;p__Firmicutes;c__Bacilli;o__Lactobacillales;f__Lactobacillaceae;g__                                    | 4002  | 2366  | 2819  | 955   | 1577  |
| k__Bacteria;p__Firmicutes;c__Bacilli;o__Lactobacillales;f__Lactobacillaceae;g__Lactobacillus                       | 29938 | 31835 | 4571  | 32303 | 28501 |
| k__Bacteria;p__Firmicutes;c__Bacilli;o__Lactobacillales;f__Streptococcaceae;Other                                  | 4     | 75    | 42    | 6     | 11    |
| k__Bacteria;p__Firmicutes;c__Bacilli;o__Lactobacillales;f__Streptococcaceae;g__Streptococcus                       | 0     | 2     | 2     | 2     | 0     |
| k__Bacteria;p__Firmicutes;c__Bacilli;o__Turicibacterales;f__Turicibacteraceae;g__Turicibacter                      | 0     | 3     | 50    | 22    | 440   |
| k__Bacteria;p__Firmicutes;c__Clostridia;Other;Other;Other                                                          | 20    | 6     | 25    | 10    | 0     |
| k__Bacteria;p__Firmicutes;c__Clostridia;o__f__g__                                                                  | 54    | 18    | 5     | 9     | 2     |
| k__Bacteria;p__Firmicutes;c__Clostridia;o__Clostridiales;Other;Other                                               | 7869  | 888   | 1     | 3     | 21    |
| k__Bacteria;p__Firmicutes;c__Clostridia;o__Clostridiales;f__g__                                                    | 37    | 0     | 7     | 5     | 0     |
| k__Bacteria;p__Firmicutes;c__Clostridia;o__Clostridiales;f__Clostridiaceae;g__                                     | 96    | 32    | 39    | 21    | 12    |
| k__Bacteria;p__Firmicutes;c__Clostridia;o__Clostridiales;f__Clostridiaceae;g__Clostridium                          | 0     | 1548  | 3172  | 1019  | 629   |
| k__Bacteria;p__Firmicutes;c__Clostridia;o__Clostridiales;f__Dehalobacteriaceae;g__Dehalobacterium                  | 48    | 3     | 2     | 1     | 1     |
| k__Bacteria;p__Firmicutes;c__Clostridia;o__Clostridiales;f__Lachnospiraceae;Other                                  | 354   | 578   | 3144  | 990   | 221   |
| k__Bacteria;p__Firmicutes;c__Clostridia;o__Clostridiales;f__Lachnospiraceae;g__                                    | 1639  | 616   | 3015  | 1391  | 235   |
| k__Bacteria;p__Firmicutes;c__Clostridia;o__Clostridiales;f__Lachnospiraceae;g__Anaerostipes                        | 36    | 0     | 0     | 0     | 0     |
| k__Bacteria;p__Firmicutes;c__Clostridia;o__Clostridiales;f__Lachnospiraceae;g__[Ruminococcus]                      | 272   | 128   | 1022  | 13    | 54    |
| k__Bacteria;p__Firmicutes;c__Clostridia;o__Clostridiales;f__Peptococcaceae;g__                                     | 3     | 0     | 1     | 0     | 0     |
| k__Bacteria;p__Firmicutes;c__Clostridia;o__Clostridiales;f__Peptostreptococcaceae;g__                              | 552   | 4394  | 11249 | 1433  | 2100  |
| k__Bacteria;p__Firmicutes;c__Clostridia;o__Clostridiales;f__Ruminococcaceae;Other                                  | 271   | 41    | 42    | 38    | 17    |
| k__Bacteria;p__Firmicutes;c__Clostridia;o__Clostridiales;f__Ruminococcaceae;g__                                    | 1602  | 12    | 26    | 16    | 143   |
| k__Bacteria;p__Firmicutes;c__Clostridia;o__Clostridiales;f__Ruminococcaceae;g__Anaerotruncus                       | 7     | 25    | 5     | 0     | 0     |
| k__Bacteria;p__Firmicutes;c__Clostridia;o__Clostridiales;f__Ruminococcaceae;g__Oscillospira                        | 812   | 89    | 62    | 105   | 18    |
| k__Bacteria;p__Firmicutes;c__Clostridia;o__Clostridiales;f__Ruminococcaceae;g__Ruminococcus                        | 132   | 6     | 13    | 9     | 0     |
| k__Bacteria;p__Firmicutes;c__Clostridia;o__Coriobacteriales;f__g__                                                 | 5     | 0     | 0     | 0     | 0     |
| k__Bacteria;p__Firmicutes;c__Clostridia;o__Coriobacteriales;f__Coriobacteriaceae;g__                               | 45    | 0     | 0     | 0     | 0     |
| k__Bacteria;p__Firmicutes;c__Clostridia;o__Coriobacteriales;f__Coriobacteriaceae;g__Adlercreutzia                  | 1475  | 198   | 1895  | 552   | 362   |
| k__Bacteria;p__Firmicutes;c__Erysipelotrichi;o__Erysipelotrichales;f__Erysipelotrichaceae;g__                      | 105   | 2     | 4     | 2     | 4     |
| k__Bacteria;p__Firmicutes;c__Erysipelotrichi;o__Erysipelotrichales;f__Erysipelotrichaceae;g__Allobaculum           | 7075  | 55    | 16044 | 20682 | 12585 |
| k__Bacteria;p__Firmicutes;c__Erysipelotrichi;o__Erysipelotrichales;f__[Coprobaecillaceae];g__                      | 0     | 4     | 0     | 0     | 0     |
| k__Bacteria;p__Firmicutes;c__Erysipelotrichi;o__Erysipelotrichales;f__[Coprobaecillaceae];g__Coprobaecillus        | 156   | 0     | 0     | 0     | 0     |
| k__Bacteria;p__Proteobacteria;c__Alphaproteobacteria;o__f__g__                                                     | 6     | 0     | 0     | 0     | 0     |
| k__Bacteria;p__Proteobacteria;c__Alphaproteobacteria;o__RF32;f__g__                                                | 8     | 0     | 0     | 0     | 0     |
| k__Bacteria;p__Proteobacteria;c__Betaproteobacteria;o__Burkholderiales;f__Alcaligenaceae;g__Sutterella             | 258   | 10    | 0     | 0     | 0     |
| k__Bacteria;p__Proteobacteria;c__Betaproteobacteria;o__Burkholderiales;f__Burkholderiaceae;g__                     | 2     | 0     | 0     | 0     | 0     |
| k__Bacteria;p__Proteobacteria;c__Deltaproteobacteria;o__Desulfovibrionales;f__Desulfovibrionaceae;g__Bilophila     | 0     | 0     | 0     | 1     | 1     |
| k__Bacteria;p__Proteobacteria;c__Deltaproteobacteria;o__Desulfovibrionales;f__Desulfovibrionaceae;g__Desulfovibrio | 155   | 25    | 219   | 89    | 31    |
| k__Bacteria;p__Proteobacteria;c__Epsilonproteobacteria;o__Campylobacteriales;f__Helicobacteraceae;Other            | 38    | 2     | 0     | 0     | 0     |
| k__Bacteria;p__Proteobacteria;c__Epsilonproteobacteria;o__Campylobacteriales;f__Helicobacteraceae;g__Helicobacter  | 377   | 1143  | 0     | 23    | 2     |
| k__Bacteria;p__Proteobacteria;c__Gammaproteobacteria;o__Enterobacteriales;f__Enterobacteriaceae;Other              | 0     | 2611  | 26    | 233   | 0     |
| k__Bacteria;p__Proteobacteria;c__Gammaproteobacteria;o__Enterobacteriales;f__Enterobacteriaceae;g__Erwinia         | 0     | 0     | 0     | 2     | 0     |
| k__Bacteria;p__Proteobacteria;c__Gammaproteobacteria;o__Enterobacteriales;f__Enterobacteriaceae;g__Escherichia     | 0     | 1784  | 46    | 107   | 0     |
| k__Bacteria;p__Proteobacteria;c__Gammaproteobacteria;o__Enterobacteriales;f__Enterobacteriaceae;g__Klebsiella      | 0     | 5507  | 0     | 0     | 0     |
| k__Bacteria;p__Proteobacteria;c__Gammaproteobacteria;o__Enterobacteriales;f__Enterobacteriaceae;g__Trabulsiella    | 0     | 113   | 1     | 0     | 0     |
| k__Bacteria;p__Spirochaetes;c__[Brachyspirae];o__[Brachyspirales];f__Brachyspiraceae;g__Brachyspira                | 5     | 0     | 0     | 0     | 0     |
| k__Bacteria;p__TM7;c__TM7-3;o__CW040;f__F16;g__                                                                    | 1333  | 0     | 726   | 851   | 2108  |
| k__Bacteria;p__Verrucomicrobia;c__Verrucomicrobiae;o__Verrucomicrobiales;f__Verrucomicrobiaceae;g__Akkermansia     | 0     | 32    | 0     | 19    | 0     |

**Supplemental Table 6.** Oligonucleotides used for quantitative RT-PCR.

| <b>Target</b>         | <b>Forward Primer</b>           | <b>Reverse Primer</b>           |
|-----------------------|---------------------------------|---------------------------------|
| BACS                  | ACC CTG GAT CAG CTC CTG GAT     | GTT CTC AGC TAG CAG CTT GG      |
| BAT                   | GGA AAC CTG TTA GTT CTC AGG C   | GTG GAC CCC CAT ATA GTC TCC     |
| BSEP                  | CTG CCA AGG ATG CTA ATG CA      | CGA TGG CTA CCC TTT GCT TCT     |
| IBAT                  | ACC ACT TGC TCC ACA CTG CTT     | CGT TCC TGA GTC AAC CCA CAT     |
| MRP3                  | TCC CAC TTT TCG GAG ACA GTA AC  | ACT GAG GAC CTT GAA GTC TTG GA  |
| NTCP                  | ATG ACC ACC TGC TCC AGC TT      | GCC TTT GTA GGG CAC CTT GT      |
| OATP1                 | CAG TCT TAC GAG TGT GCT CCA GAT | ATG AGG AAT ACT GCC TCT GAA GTG |
| OST $\alpha$          | TGT TCC AGG TGC TTG TCA TCC     | CCA CTG TTA GCC AAG ATG GAG AA  |
| OST $\beta$           | GAT GCG GCT CCT TGG AAT TA      | GGA GGA ACA TGC TTG TCA TGA C   |
| IBABP                 | CAG GAG ACG TGA TTG AAA GGG     | GCC CCC AGA GTA AGA CTG GG      |
| <i>A. muciniphila</i> | CAG CAC GTG AAG GTG GGG AC      | CCT TGC GGT TGG CTT CAG AT      |
| <i>C. minuta</i>      | TTC GGG AGG AAC TGT GGG TAT     | GGT TGC TCA CGC GTT ACT CA      |
